# Supplementary material for: Magnetically recoverable AuPd nanoparticles prepared by a coordination capture method as a reusable catalyst for green oxidation of benzyl alcohol
Source: Royal Society of Chemistry journal article supplement (doi:10.1039/c3cy00261f), 2013-01-01
Supplement: c3cy00261f.pdf [file c3cy00261f.pdf]

## Electronic Supplementary Information

### Magnetically recoverable AuPd nanoparticles prepared by a coordination capture method as reusable catalyst for green oxidation of benzyl alcohol

Tiago A. G. Silva, Richard Landers and Liane M. Rossi\*

STEM images were acquired using a JEOL-JEM 2100F TEM microscope available at the LNNano Laboratory (CNPEM, Campinas, Brazil).

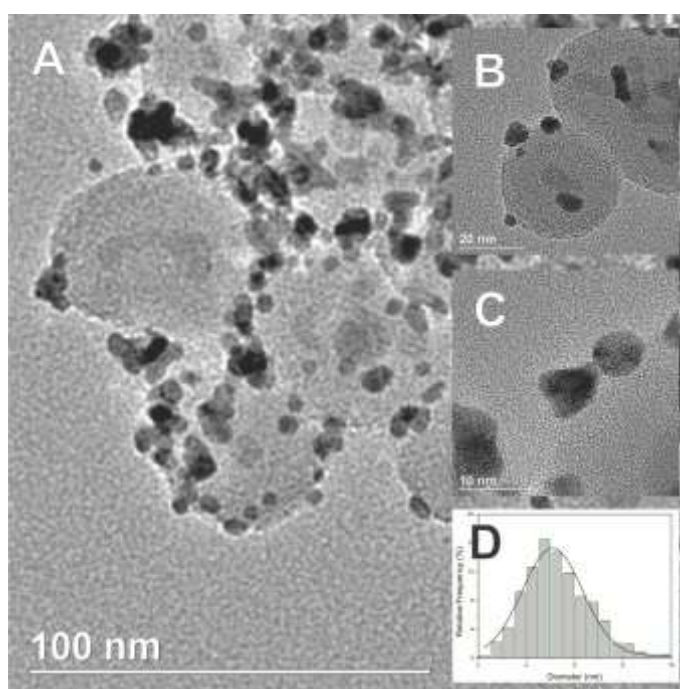

Figure S1. (a) TEM image of  $\text{Fe}_3\text{O}_4@\text{SiO}_2\text{-NH}_2\text{AuPd}$ . (b) and (c) TEM images with higher magnification of supported AuPd NPs. (d) size distribution histogram. Mean size  $5.1 \pm 1.2$  nm.

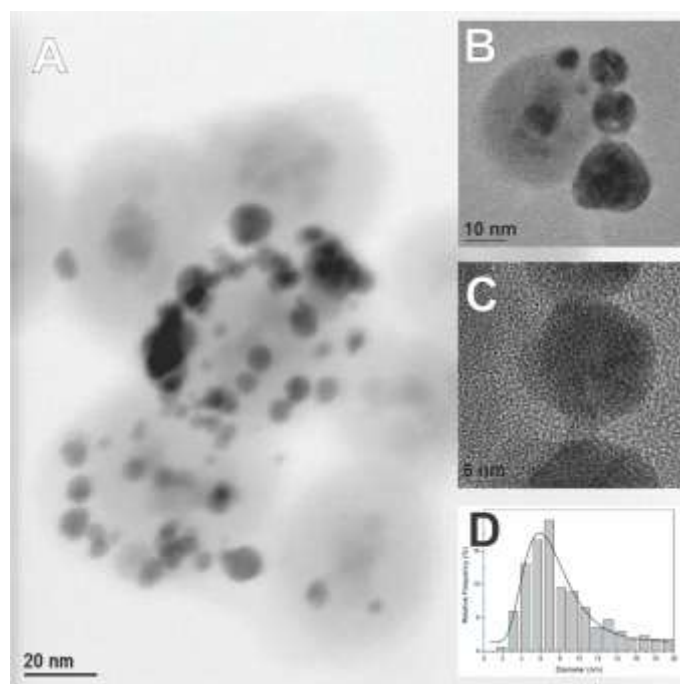

Figure S2. (a) STEM image of  $\text{Fe}_3\text{O}_4@\text{SiO}_2\text{-NH}_2\text{AuPd(C)}$  (calcined catalyst). (b) and (c) TEM images with higher magnification of supported AuPd NPs. (d) size distribution histogram. Mean size 6,8 nm ( $\sigma = 0.38$ ).

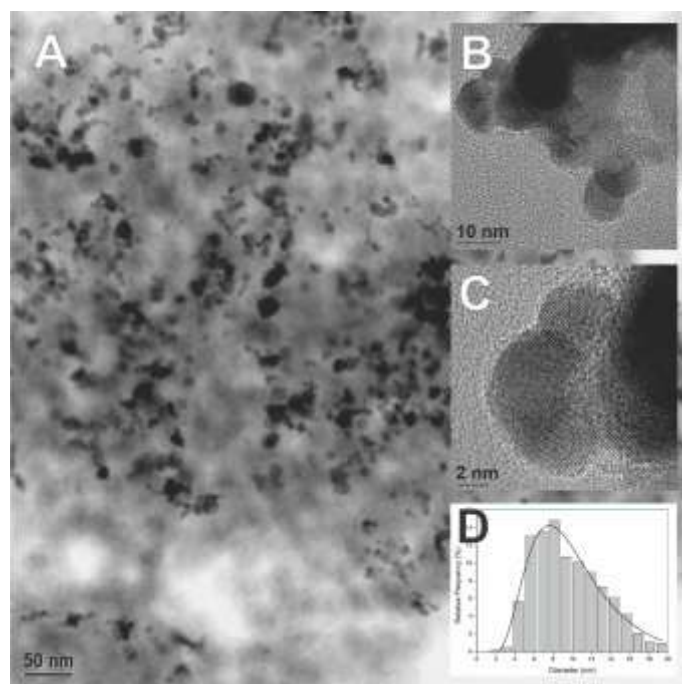

Figure S2. (a) STEM image of  $\text{Fe}_3\text{O}_4@\text{SiO}_2\text{-NH}_2\text{AuPd(C)R5}$  (calcined catalyst after 5 reuses). (b) and (c) TEM images with higher magnification of supported AuPd NPs. (d) size distribution histogram. Mean size 9,3 nm ( $\sigma = 0.45$ ).
